# Supplementary material
Source: PubMed Central journal article supplement (PMC4494660)
Supplement: NIHMS700343-supplement-supplement.pdf [file NIHMS700343-supplement-supplement.pdf]

## Supplementary file 2

### Non-standardized mortality rates according to population group

|                                           | Mortality rates (deaths per 1000 individuals per year) |                 |                   |                 |
|-------------------------------------------|--------------------------------------------------------|-----------------|-------------------|-----------------|
|                                           | Rural                                                  | Migrant         | Urban             | Total           |
| <b>All cause mortality</b>                | 9.1 (4.9 – 16.9)                                       | 4.6 (2.6 – 8.1) | 10.1 (5.2 – 19.3) | 6.7 (4.7 – 9.6) |
| <b>Cardiovascular (CV) mortality</b>      | 0.9 (0.1 – 6.5)                                        | 0.8 (0.2 – 3.1) | 6.7 (3.0 – 14.9)  | 2.0 (1.0 – 3.8) |
| <b>Cancer mortality</b>                   | 0.9 (0.1 – 6.5)                                        | 1.9 (0.8 – 4.6) | 2.2 (0.6 – 8.9)   | 1.7 (0.9 – 3.5) |
| <b>Injuries mortality</b>                 | 1.8 (0.5 – 7.3)                                        | 0.8 (0.2 – 3.1) | --                | 0.9 (0.3 – 2.3) |
| <b>Infectious diseases mortality</b>      | 3.6 (1.4 – 9.7)                                        | 0.4 (0.1 – 2.7) | --                | 1.1 (0.4 – 2.6) |
| <b>Other causes</b>                       | 1.8 (0.5 – 7.3)                                        | 0.8 (0.2 – 3.1) | 1.1 (0.2 – 7.9)   | 1.1 (0.5 – 2.6) |
| <b>NCD mortality (CV + cancer deaths)</b> | 1.8 (0.5 – 7.3)                                        | 2.7 (1.3 – 5.6) | 8.9 (4.5 – 17.9)  | 3.7 (2.3 – 5.9) |

-- Not calculable because there were not deaths available
